# Supplementary material
Source: PubMed Central journal article supplement (PMC4850325)
Supplement: mmc1.pdf [file mmc1.pdf]

**Biophysical Journal, Volume 110**

**Supplemental Information**

**Imaging Extracellular Matrix Remodeling In Vitro by Diffusion-Sensitive  
Optical Coherence Tomography**

**Richard L. Blackmon, Rupninder Sandhu, Brian S. Chapman, Patricia Casbas-Hernandez, Joseph B. Tracy, Melissa A. Troester, and Amy L. Oldenburg**

**Biophysical Journal**

**Supporting Material**

**Imaging Extracellular Matrix Remodeling In Vitro by Diffusion-Sensitive Optical Coherence Tomography**

Richard L. Blackmon,<sup>1</sup> Rupninder Sandhu,<sup>2</sup> Brian S. Chapman,<sup>3</sup> Patricia Casbas-Hernandez,<sup>4</sup> Joseph B. Tracy,<sup>3</sup> Melissa A. Troester,<sup>5</sup> and Amy L. Oldenburg<sup>1,5,6,\*</sup>

<sup>1</sup>Physics and Astronomy and <sup>2</sup>Lineberger Comprehensive Cancer Center, University of North Carolina at Chapel Hill, Chapel Hill, North Carolina; <sup>3</sup>Materials Science and Engineering, North Carolina State University, Raleigh, North Carolina; <sup>4</sup>Epidemiology and Biochemistry, Ponce Health Sciences University, Ponce, Puerto Rico; and <sup>5</sup>Department of Epidemiology and <sup>6</sup>Biomedical Research Imaging Center, University of North Carolina at Chapel Hill, Chapel Hill, North Carolina

\*Correspondence: aold@physics.unc.edu

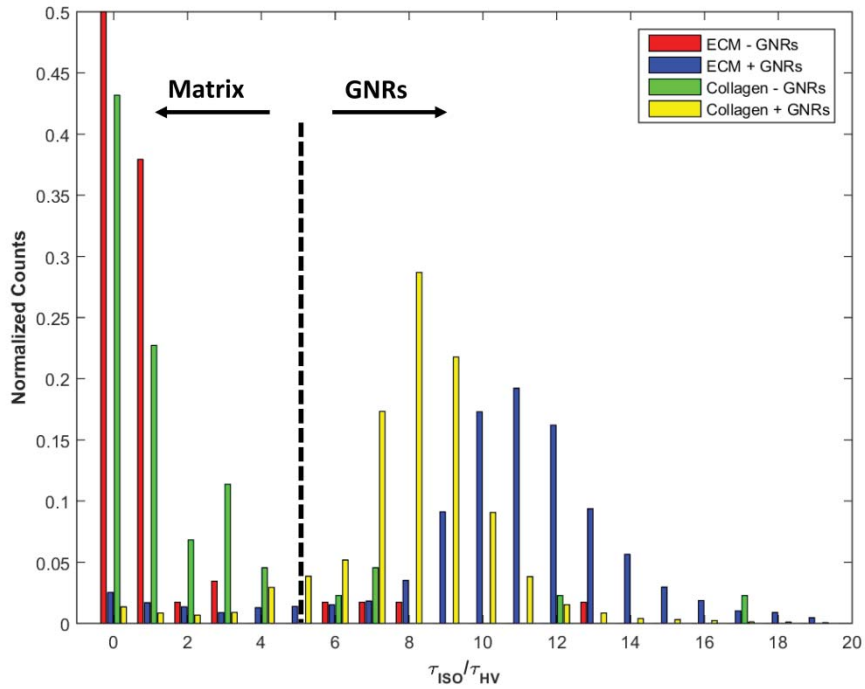

**Figure S1** – Histogram of the ratio of isotropic ( $\tau_{ISO}$ ) and cross-polarized ( $\tau_{HV}$ ) decay times in artificial ECM (no cells) and collagen (2 mg/mL) with and without GNRs. With GNRs, the two OCT output signal decorrelation rates are different, owing to faster GNR rotational diffusion dominating the HV channel, yielding  $\tau_{ISO}/\tau_{HV} > 5$  (Eqn. 3). However, in matrices without GNRs, the two output signals fluctuate at the same rate, yielding  $\tau_{ISO}/\tau_{HV} \approx 1$ . This property was used to identify regions containing GNRs in all samples, providing contrast against GNR-void cells in RMF cultures.

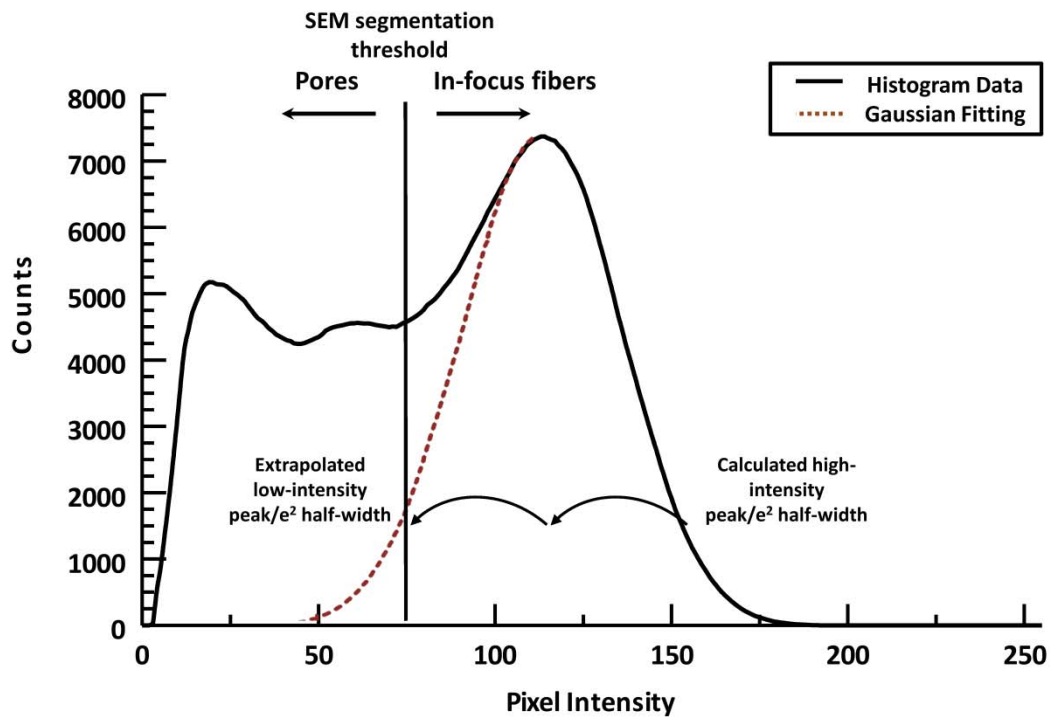

**Figure S2** – Representative histogram of pixel intensities from SEM images of collagen showing the method for determining the location of the segmentation threshold to separate in-focus fibers from pores.

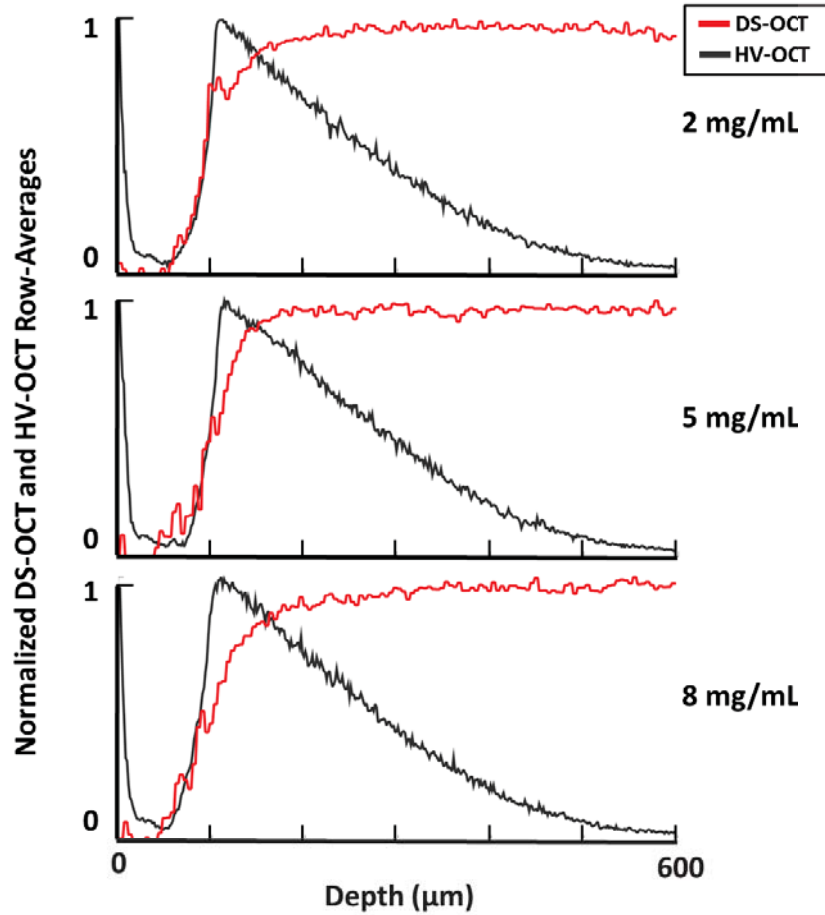

**Figure S3** – Normalized averages of pixel values across each row of HV- and DS-OCT images shown in Fig. 1 for 2, 5, and 8 mg/mL collagen. These plots demonstrate the stability of the DS-OCT signal for the entire depth of each image, despite the intensity values at those depths reaching the noise floor.

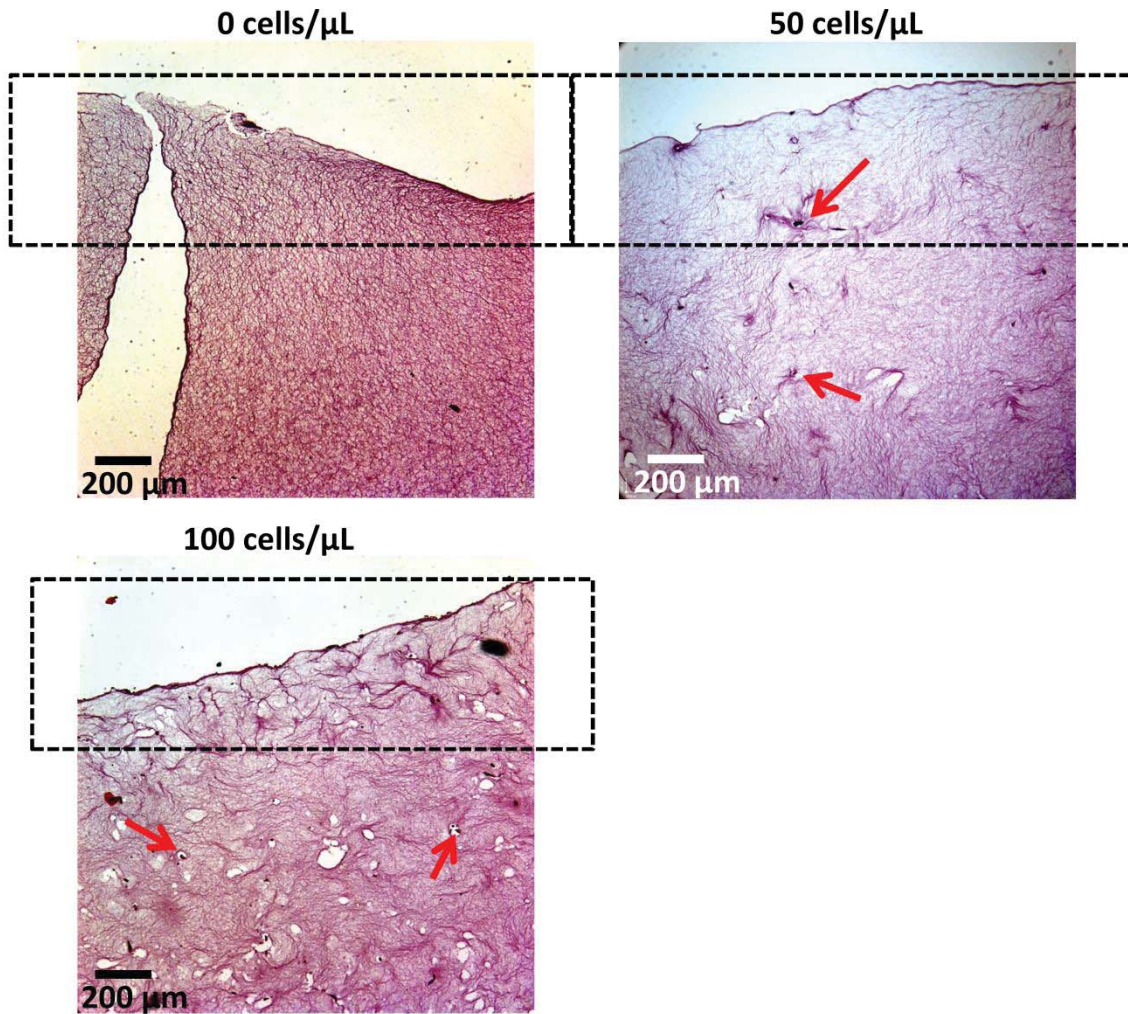

**Figure S4** - Histology of cultures with the same conditions as those reported in Fig. 5. Red arrows: locations of RMF cells within tissue. Dotted box: The size of a DS-OCT imaging window on this size scale.

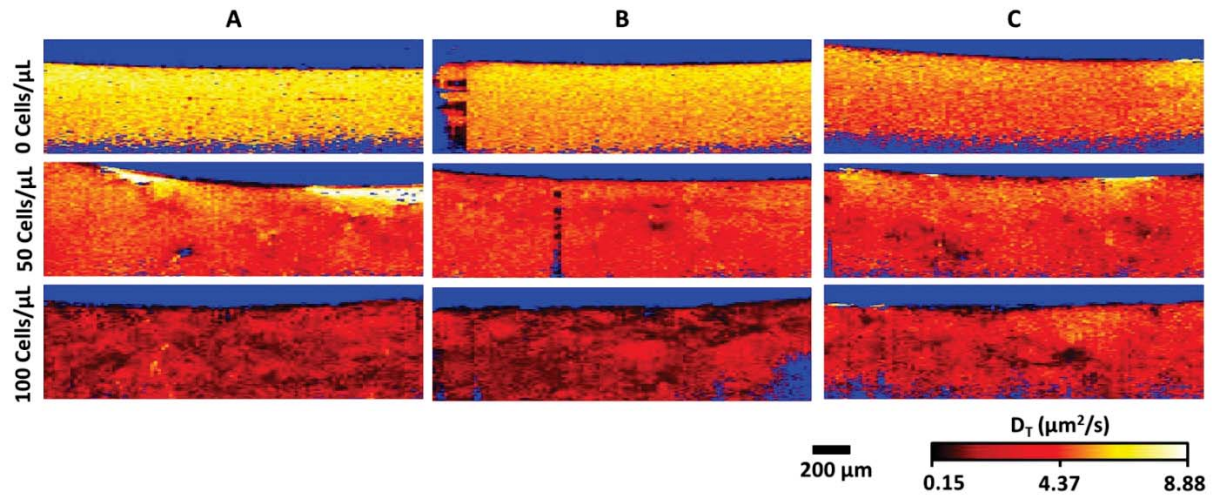

**Figure S5** – Repeated experiments showing the consistency in DS-OCT measurements in artificial ECM heterogeneity. A: Data presented in manuscript (Figure 5) for 0, 50, and 100 cell/ $\mu\text{L}$  seed densities at 11 days of incubation. B: A replicate of A, with the same seed densities and incubation time. C: A comparison to A, with the same seed densities but only 7 days of incubation.
